# Supplementary material
Source: HighWire-hosted journal article supplement (https://erj.ersjournals.com/content/57/3/2002384)
Supplement: inline-supplementary-material-1 [file inline-supplementary-material-1.pdf]

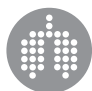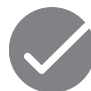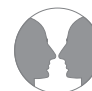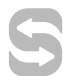

SHAREABLE PDF

# Plasma mediators in patients with severe COVID-19 cause lung endothelial barrier failure

Laura Michalick<sup>1</sup>, Sarah Weidenfeld<sup>1</sup>, Benjamin Grimmer<sup>1</sup>, Diana Fatykhova<sup>2</sup>, Philip Daniel Solymosi<sup>1</sup>, Felix Behrens<sup>1,3</sup>, Melanie Dohmen<sup>2,4</sup>, Markus C. Brack<sup>2</sup>, Sabrina Schulz<sup>1</sup>, Elisa Thomasch<sup>1</sup>, Szandor Simmons<sup>1</sup>, Holger Müller-Redetzky<sup>2</sup>, Norbert Suttorp<sup>2,5</sup>, Florian Kurth<sup>2</sup>, Jens Neudecker<sup>6</sup>, Mario Toennies<sup>7</sup>, Torsten T. Bauer<sup>7</sup>, Stephan Eggeling<sup>8</sup>, Victor Max Corman<sup>9,10</sup>, Andreas C. Hocke<sup>2,5</sup>, Martin Witztenrath<sup>2,5,14</sup>, Stefan Hippenstiel<sup>2,5,14</sup> and Wolfgang M. Kuebler<sup>1,5,11,12,13,14</sup>

**Affiliations:** <sup>1</sup>Institute of Physiology, Charité – Universitätsmedizin Berlin, corporate member of Freie Universität Berlin, Humboldt-Universität zu Berlin, and Berlin Institute of Health (BIH), Berlin, Germany. <sup>2</sup>Dept of Infectious Diseases and Respiratory Medicine, Charité – Universitätsmedizin Berlin, corporate member of Freie Universität Berlin, Humboldt-Universität zu Berlin, and Berlin Institute of Health (BIH), Berlin, Germany. <sup>3</sup>Berlin Institute of Health (BIH), Berlin, Germany. <sup>4</sup>Max Delbrück Center for Molecular Medicine, Berlin, Germany. <sup>5</sup>German Center for Lung Research (DZL), Germany. <sup>6</sup>Dept of General, Visceral, Vascular and Thoracic Surgery, Charité – Universitätsmedizin Berlin, corporate member of Freie Universität Berlin, Humboldt-Universität zu Berlin, and Berlin Institute of Health (BIH), Berlin, Germany. <sup>7</sup>Lungenklinik Heckeshorn, HELIOS Klinikum Emil von Behring, Berlin, Germany. <sup>8</sup>Vivantes Netzwerk für Gesundheit, Klinikum Neukölln, Klinik für Thoraxchirurgie, Berlin, Germany. <sup>9</sup>Institute of Virology, Charité – Universitätsmedizin Berlin, corporate member of Freie Universität Berlin, Humboldt-Universität zu Berlin, and Berlin Institute of Health (BIH), Berlin, Germany. <sup>10</sup>German Centre for Infection Research (DZIF), Germany. <sup>11</sup>The Keenan Research Centre for Biomedical Science, St. Michael's Hospital, Toronto, ON, Canada. <sup>12</sup>Depts. of Surgery and Physiology, University of Toronto, Toronto, ON, Canada. <sup>13</sup>German Centre for Cardiovascular Research (DZHK), Germany. <sup>14</sup>These authors contributed equally to this study.

**Correspondence:** Wolfgang M. Kuebler, Institute of Physiology, Charité – Universitätsmedizin Berlin, Charitéplatz 1, 10117 Berlin, Germany. E-mail: wolfgang.kuebler@charite.de

@ERSpublications

**The plasma of COVID-19 patients induces pulmonary microvascular barrier failure, which increases with disease severity. Here, a screening platform to test for plasma mediators and the therapeutic potential of barrier stabilising compounds is reported.** <https://bit.ly/3k4C0tB>

**Cite this article as:** Michalick L, Weidenfeld S, Grimmer B, *et al.* Plasma mediators in patients with severe COVID-19 cause lung endothelial barrier failure. *Eur Respir J* 2021; 57: 2002384 [<https://doi.org/10.1183/13993003.02384-2020>].

This single-page version can be shared freely online.

## To the Editor:

Approximately 20% of symptomatic patients with severe acute respiratory syndrome coronavirus 2 (SARS-CoV-2) infection progress to severe coronavirus disease 2019 (COVID-19) with critical hypoxaemia fulfilling the criteria of acute respiratory distress syndrome (ARDS). Consistent with the classic features of ARDS, severe COVID-19 is characterised by ground glass opacities on computed tomography imaging and diffuse alveolar damage *post mortem* [1], suggesting permeability-type lung oedema as driver of respiratory

failure. Consistent with this concept, autopsy findings show severe lung endothelial injury in patients who succumbed to COVID-19 [2].
